# Supplementary material
Source: PubMed Central journal article supplement (PMC1914392)

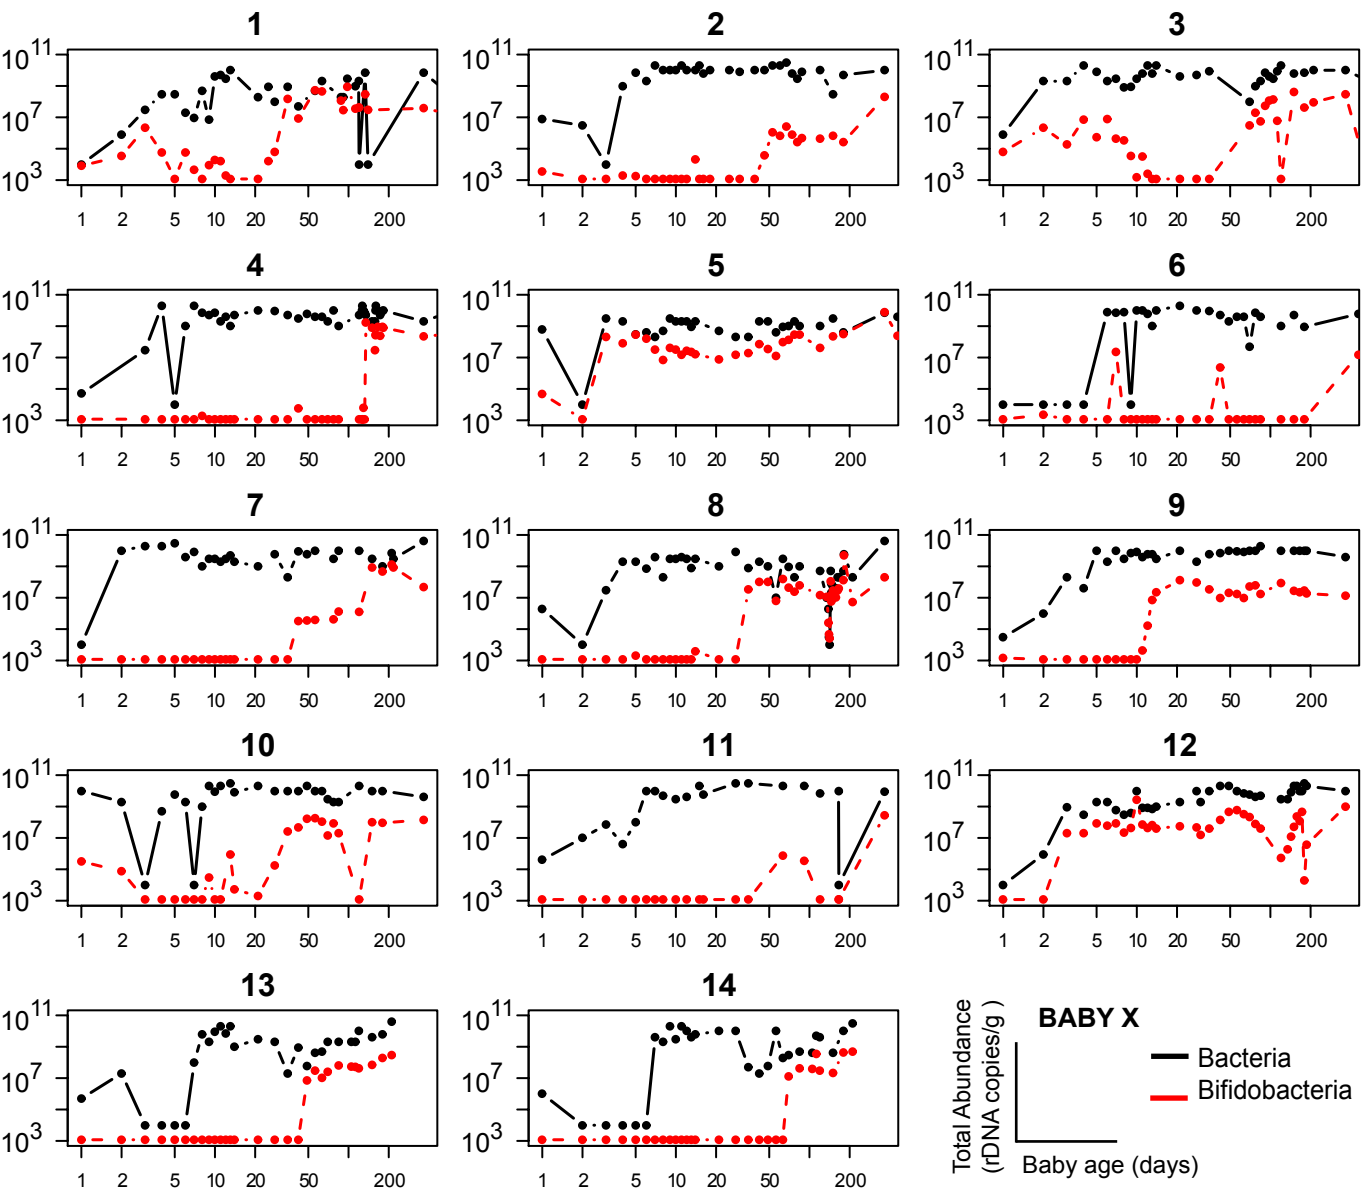

Supplement: pbio.0050177.sg001.pdf [file pbio.0050177.sg001.pdf]

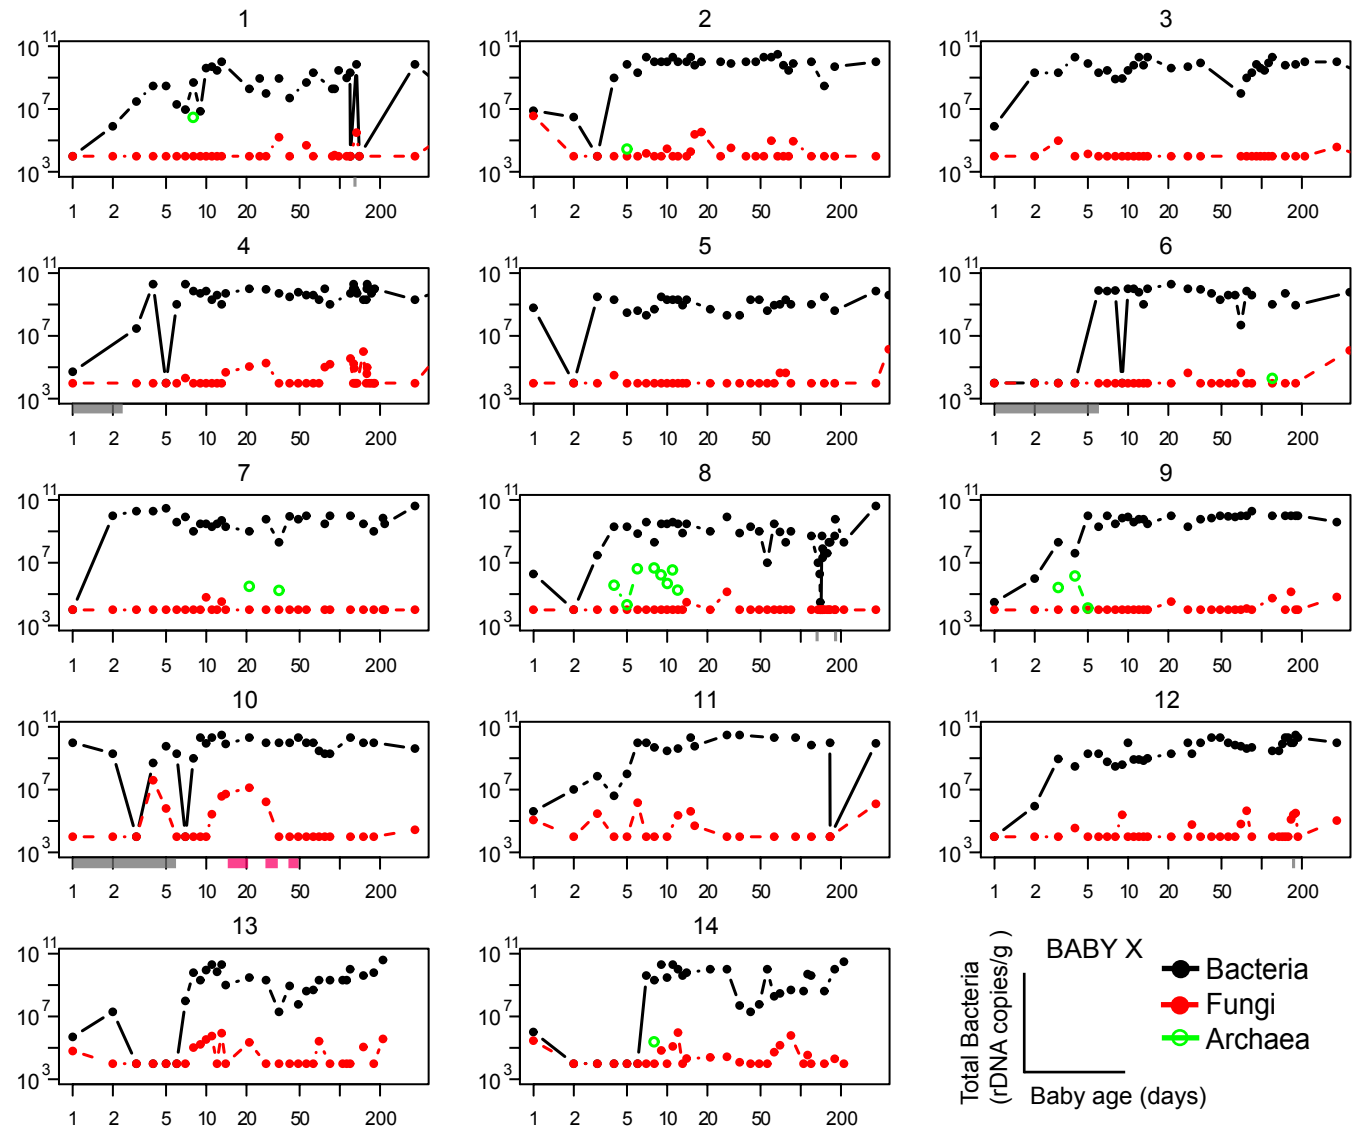

Supplement: pbio.0050177.sg002.pdf [file pbio.0050177.sg002.pdf]
